# Supplementary material
Source: Springer Nature journal article supplement (https://www.springermedizin.de/resource/supplementary/12888_2009_577_MOESM1_ESM.pdf/9483644)

## ACTION

## SAMPLE

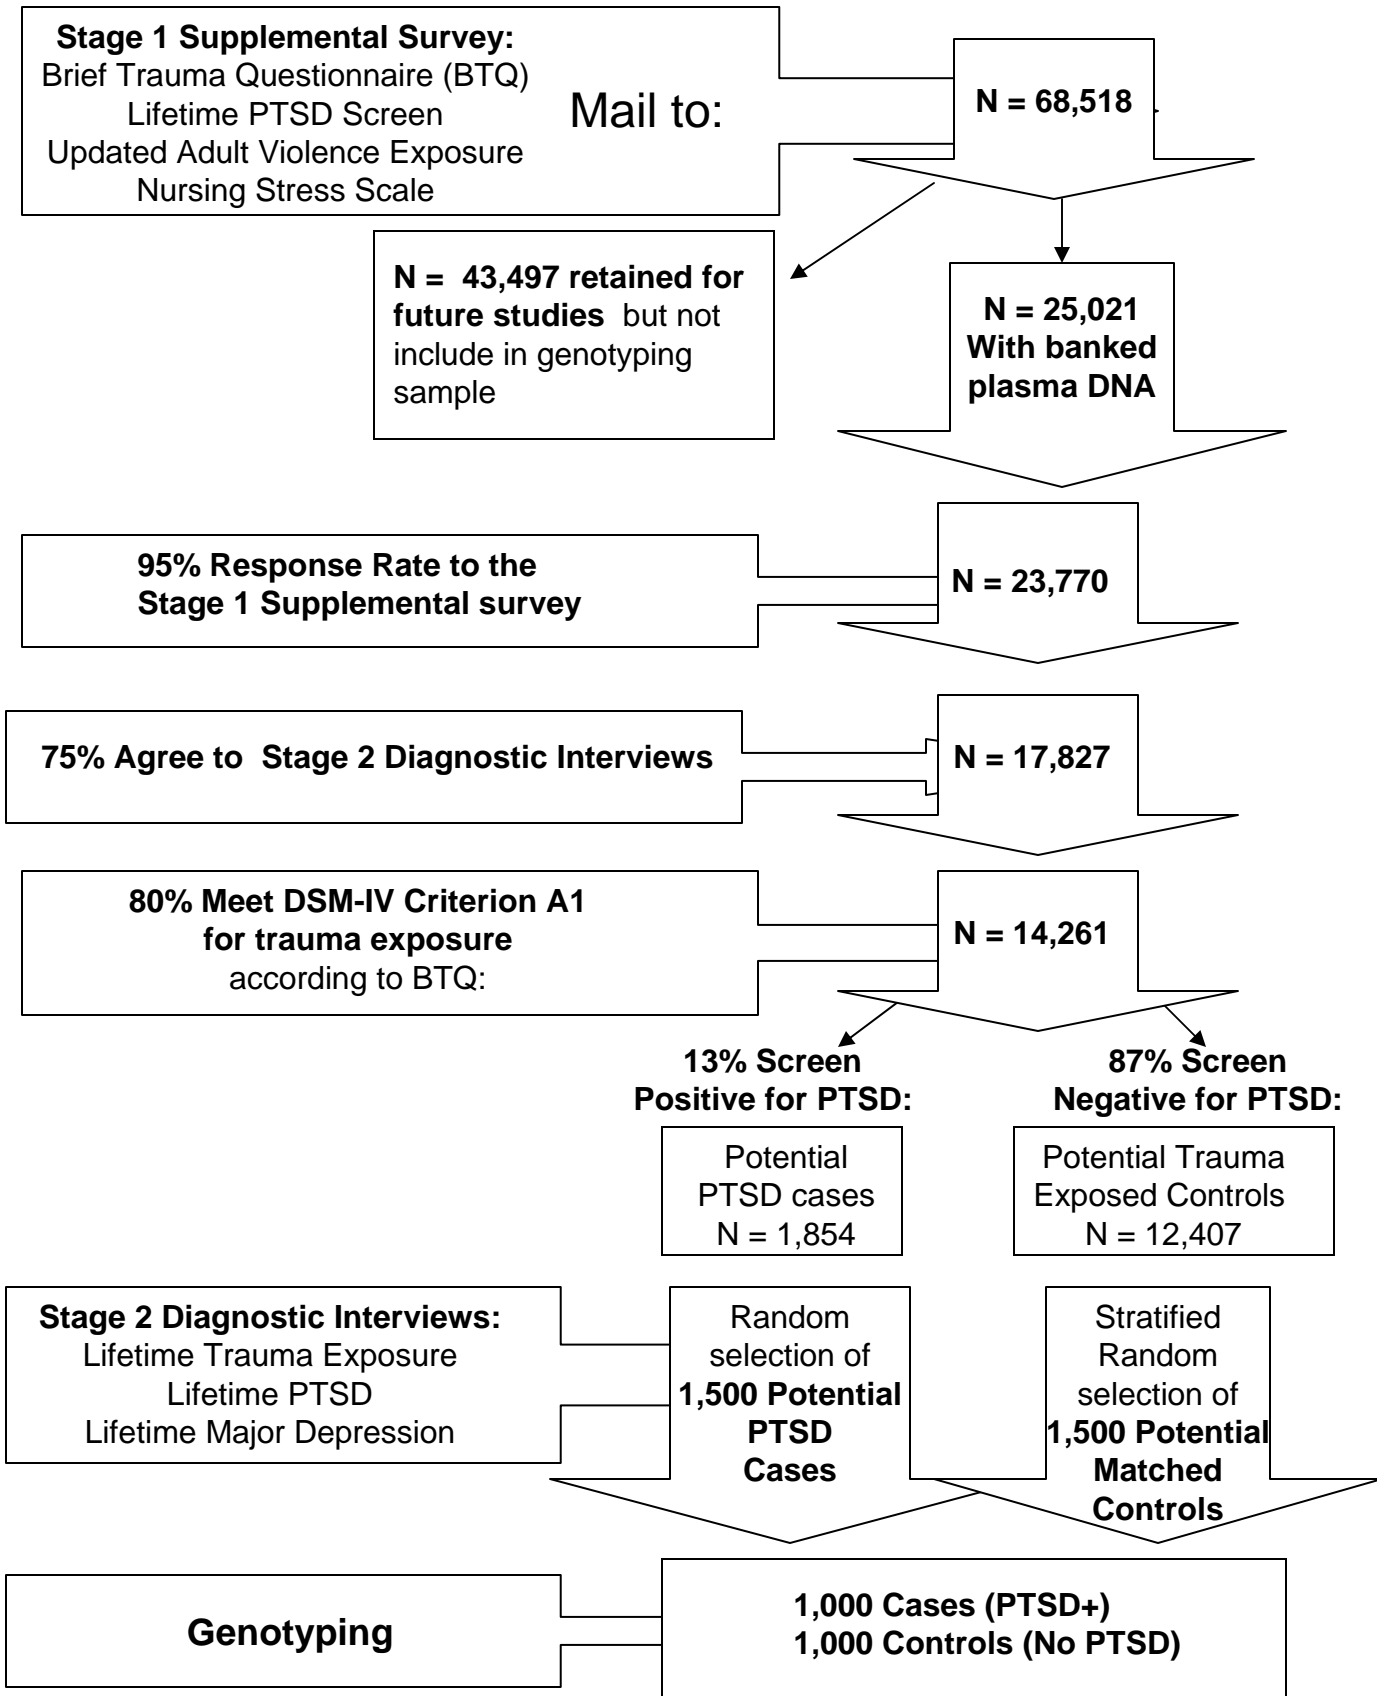

Supplement: MOESM1 [file 9483644]
